# Supplementary material
Source: PubMed Central journal article supplement (PMC7334087)
Supplement: NIHMS1589079-supplement-Supplementary_Figures_S1-S9.pdf [file NIHMS1589079-supplement-Supplementary_Figures_S1-S9.pdf]

**Tumor microenvironment remodeling enables bypass of oncogenic KRAS dependency in pancreatic cancer**

Pingping Hou, Avnish Kapoor, Qiang Zhang, Jiexi Li, Chang-Jiun Wu, Jun Li, Zhengdao Lan, Ming Tang, Xingdi Ma, Jeffrey J. Ackroyd, Raghu Kalluri, Jianhua Zhang, Shan Jiang, Denise J. Spring, Y. Alan Wang, and Ronald A. DePinho

**Supplementary Figures S1-S9**

### Supplementary Figure 1

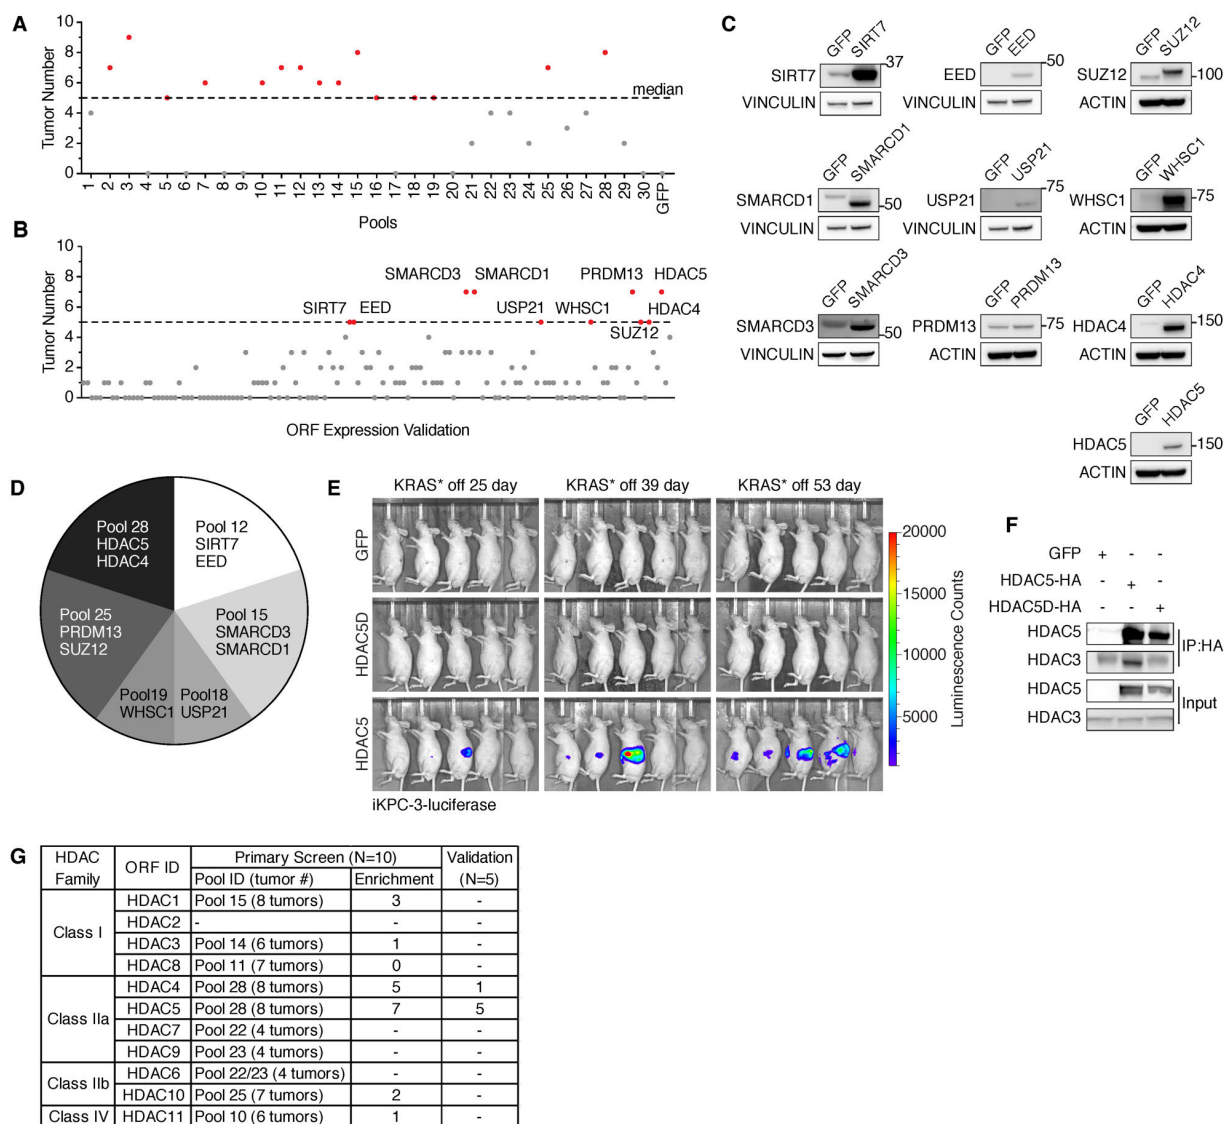

**Supplementary Figure 1. Epigenetic library screening to bypass KRAS\* dependency.** **A**, KRAS\*-independent escaper tumor numbers generated from 10 mice with orthotopically transplanted iKPC cells for each pool. Fifteen red color highlighted pools promoted the generation of more than 5 escapers and were further validated for enriched ORF expression. **B**, Validation of ORF enrichment in escaper tumors. Gene expression in escapers from 15 highlighted pools in (A) were analyzed by qRT-PCR. ORFs with gene expression levels higher in escapers than in “input” iKPC cells were considered “enriched”. The top 10 ORFs enriched in more than 5 escaper tumors are highlighted. **C**, Validation of the overexpressed top 10 gene candidates in iKPC-1 cells by western blot analysis. **D**, Distribution of the top 10 ORFs in screening sub-pools. **E**, BLI imaging

of nude mice orthotopically transplanted with GFP-, HDAC5- or HDAC5D-overexpressed (OE) iKPC-3 cells with luciferase reporter. **F**, Mutation of *HDAC5* (HDAC5D) interrupted HDAC5-HDAC3 interaction to form functional repressive complex by co-IP analysis. **G**, The capability of HDAC family members to bypass KRAS\* dependency extracted from ORF screening.

**Supplementary Figure 2**

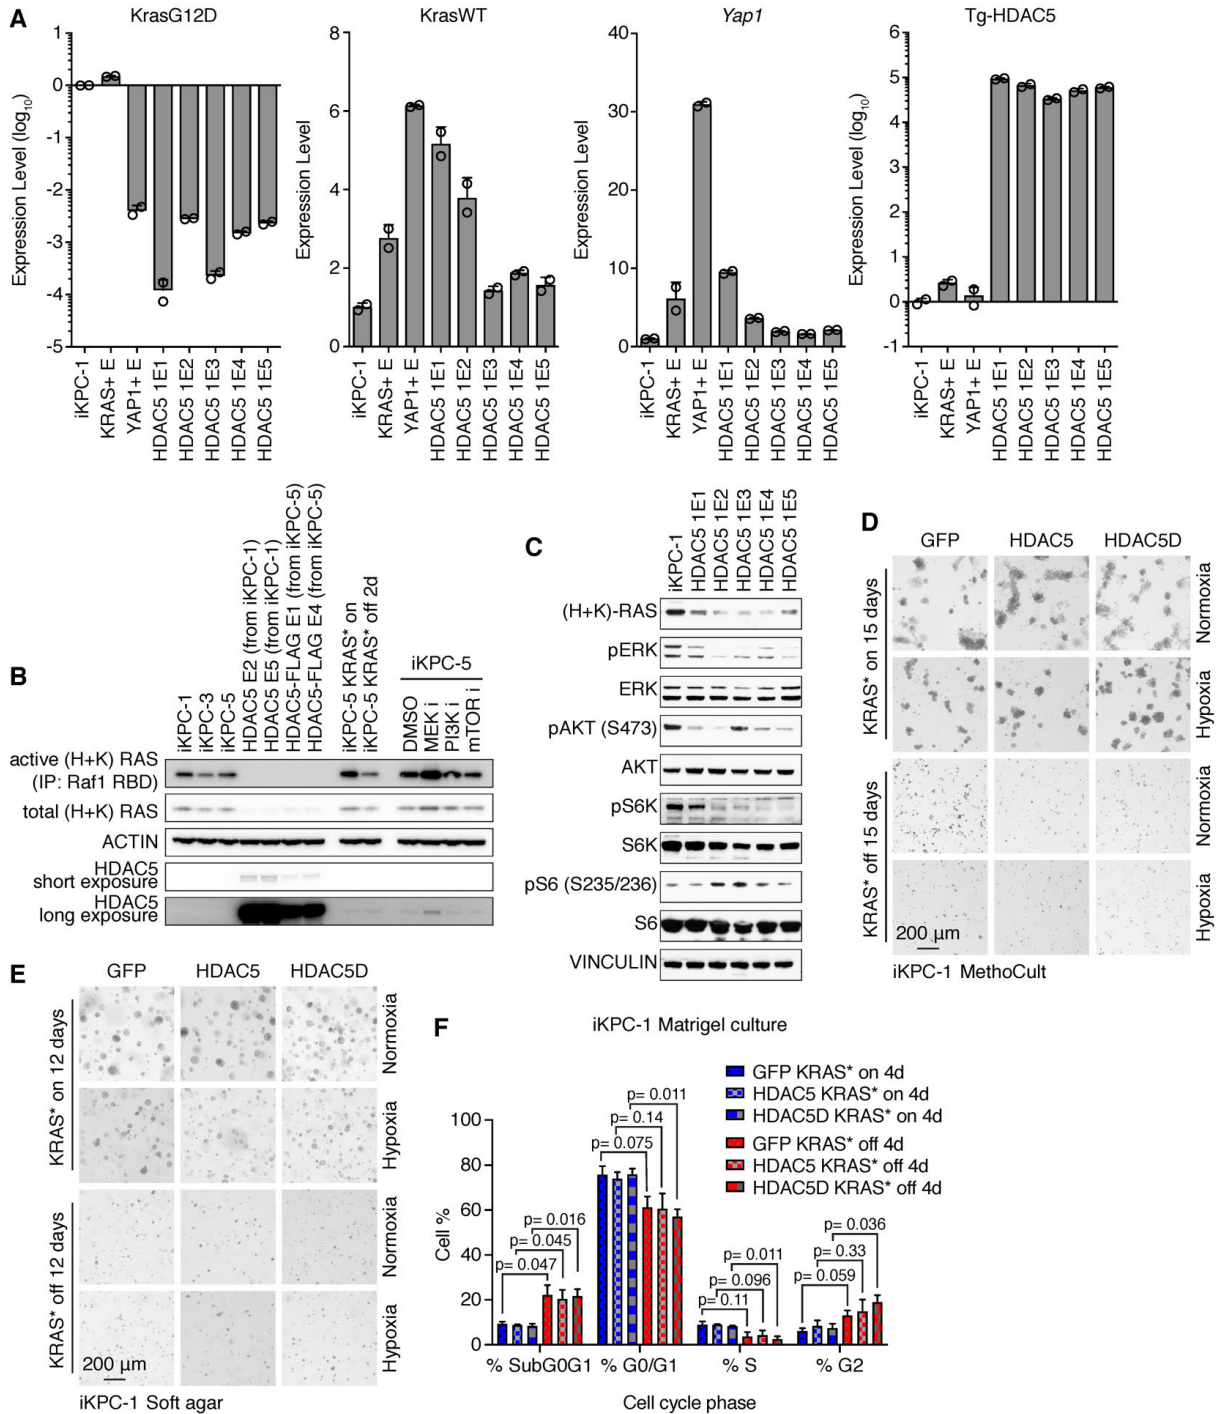

**Supplementary Figure 2. Characterization of *HDAC5* escapers.** **A**, Validation of gene expression of endogenous *Kras*, transgenic *KRAS\**, *Yap1*, and transgenic *HDAC5* (Tg-*HDAC5*) by qRT-PCR in *HDAC5* escaper cells. *KRAS\**-reactivated escaper cells and *Yap1*-amplified escaper cells were served as positive controls. Data are represented as mean  $\pm$  SD. **B**,

Determination of RAS activity in primary iKPC cells, *HDAC5* escapers, KRAS\* on and off iKPC-5 cells, and iKPC-5 cells after inhibition of KRAS\* downstream pathways. Active RAS was pulled down by agarose beads crosslinked with Ras-binding domain (RBD) of Raf1, and detected by (H+K) RAS antibody. **C**, Validation of KRAS\* downstream signaling pathways in *HDAC5* escaper cells by western blot analysis. **D-E**, The 3-D colony formation assay of GFP-, *HDAC5*- or *HDAC5D*-OE iKPC-1 cells after KRAS\* extinction in MethoCult (**D**) or soft agar (**E**) culture under normoxia or hypoxia conditions. KRAS\*-expressing cells were used as positive control. **F**, Cell cycle analysis of iKPC-1 cells with or without KRAS\* expression in Matrigel culture *in vitro*. The iKPC-1 cells overexpressing GFP, *HDAC5* or *HDAC5D* were seeded in Matrigel with or without DOX treatment, and collected after 4 days for propidium iodide staining. Three independent experiments were performed for statistical analysis. Two-tailed unpaired t tests were performed to calculate the p values.

**Supplementary Figure 3**

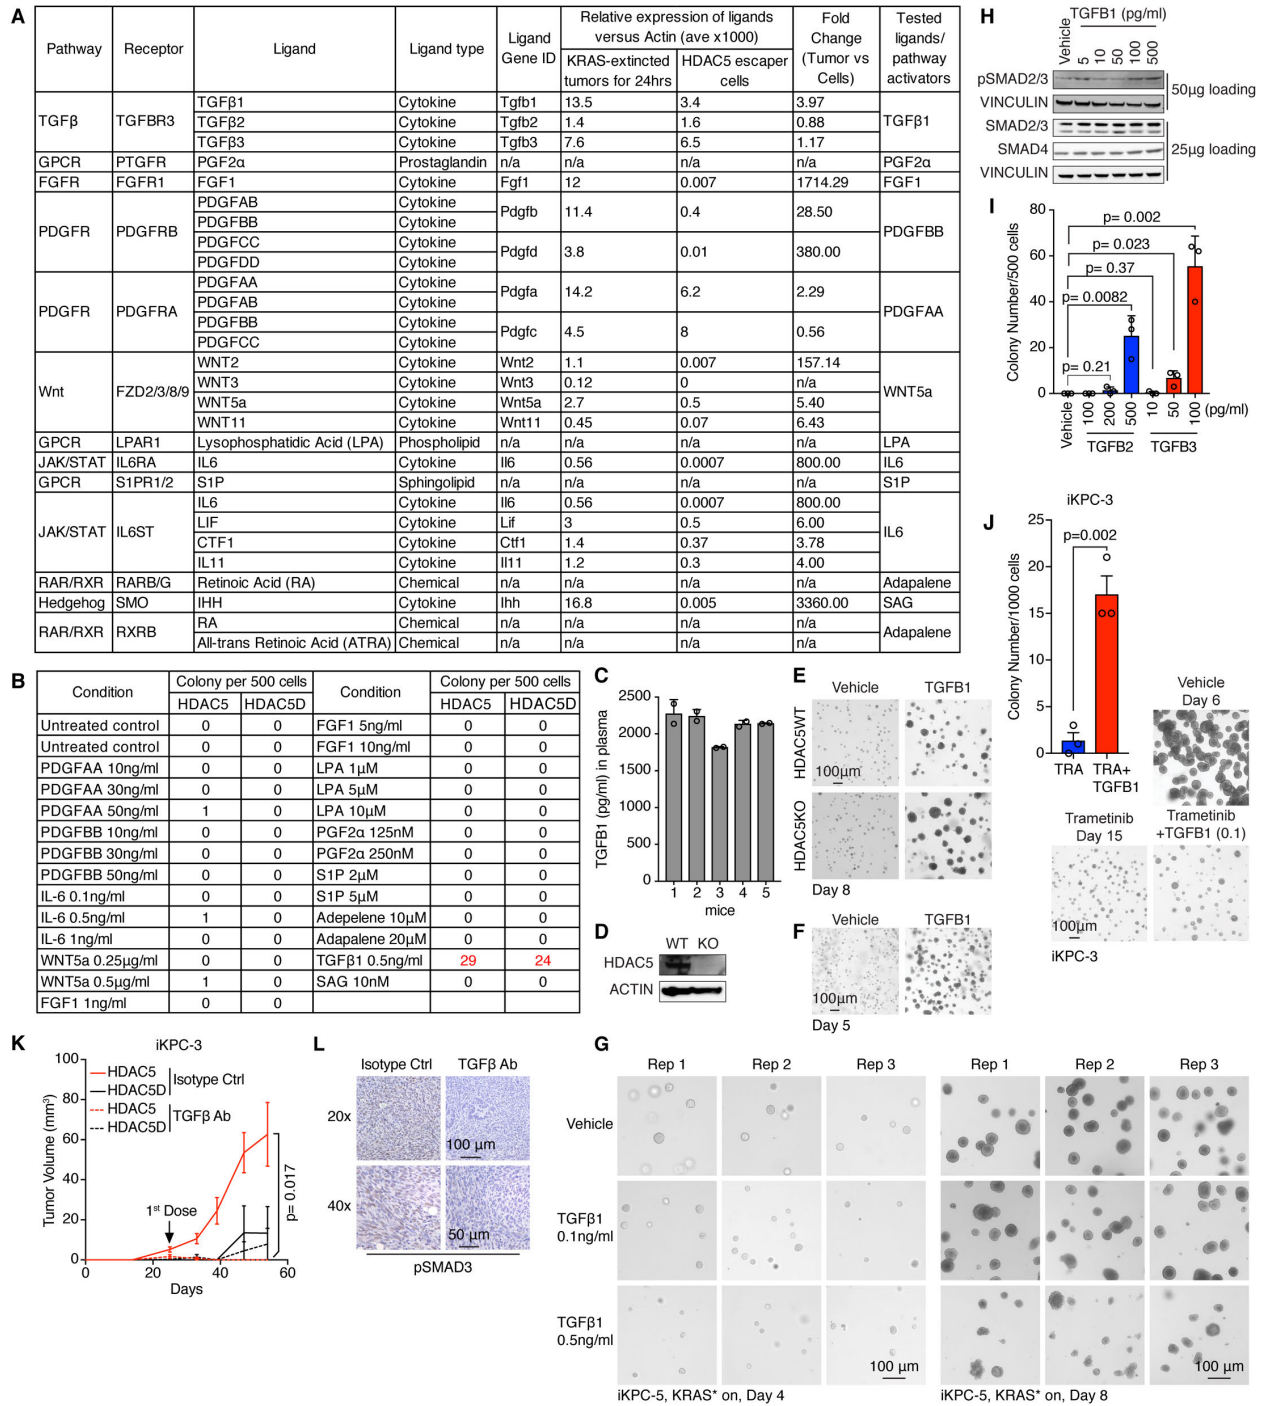

**Supplementary Figure 3. Activation of the TGFβ pathway promotes pancreatic cancer cells to bypass KRAS\* dependency.** **A**, Summary of 18 candidate receptors, corresponding ligands and small molecule activators/cytokines. **B**, Experimental design and summary of the screening results of the 13 small molecule activators or cytokines to bypass KRAS\* dependency in iKPC-3

cells. Colonies were counted at Day 9 after KRAS\* extinction. **C**, TGFβ1 concentration in 5 mouse plasma samples. **D**, Validation of *Hdac5* knockout in iKPC-5 cells by western blot analysis. **E**, TGFβ1 (0.5 ng/ml) drove KRAS\*-independent colony growth after KRAS\* extinction in *Hdac5* wildtype and *Hdac5* knockout iKPC cells. Images were taken at Day 8 after KRAS\* extinction. **F**, TGFβ1 (0.5 ng/ml) drove KRAS\*-independent colony growth after KRAS\* extinction in iKPC-1 cells. Images were taken at Day 5 after KRAS\* extinction. **G**, TGFβ treatment attenuated colony growth of KRAS\*-expressing iKPC-5 cells in 3-D culture. **H**, Activation of pSMAD2/3 in iKPC cells after TGFβ1 treatment at indicated concentrations by western blot analysis. **I**, TGFβ2 and TGFβ3 drove iKPC-3 cells to bypass KRAS\* dependency in Matrigel culture ( $n = 3$ ). Colonies were counted at Day 9 after KRAS\* extinction. **J**, TGFβ1 promoted MEK inhibition (Trametinib, 50 nM)-resistant iKPC-3 colony growth at Day 15 ( $n = 3$ ). Representative images and colony number quantification are shown. **K**, Another independent experiment showing that neutralization of TGFβ impaired KRAS\*-independent tumor growth of *HDAC5*-OE iKPC-5 cells subcutaneously transplanted in nude mice ( $n = 3$ ). **L**, IHC staining of pSMAD3 in tumors from isotype control group and TGFβ neutralizing antibody treatment group related to Fig. 2F. For I, J and K, data are represented as mean  $\pm$  SEM, and two-tailed unpaired t tests were performed to calculate the p values.

**Supplementary Figure 4**

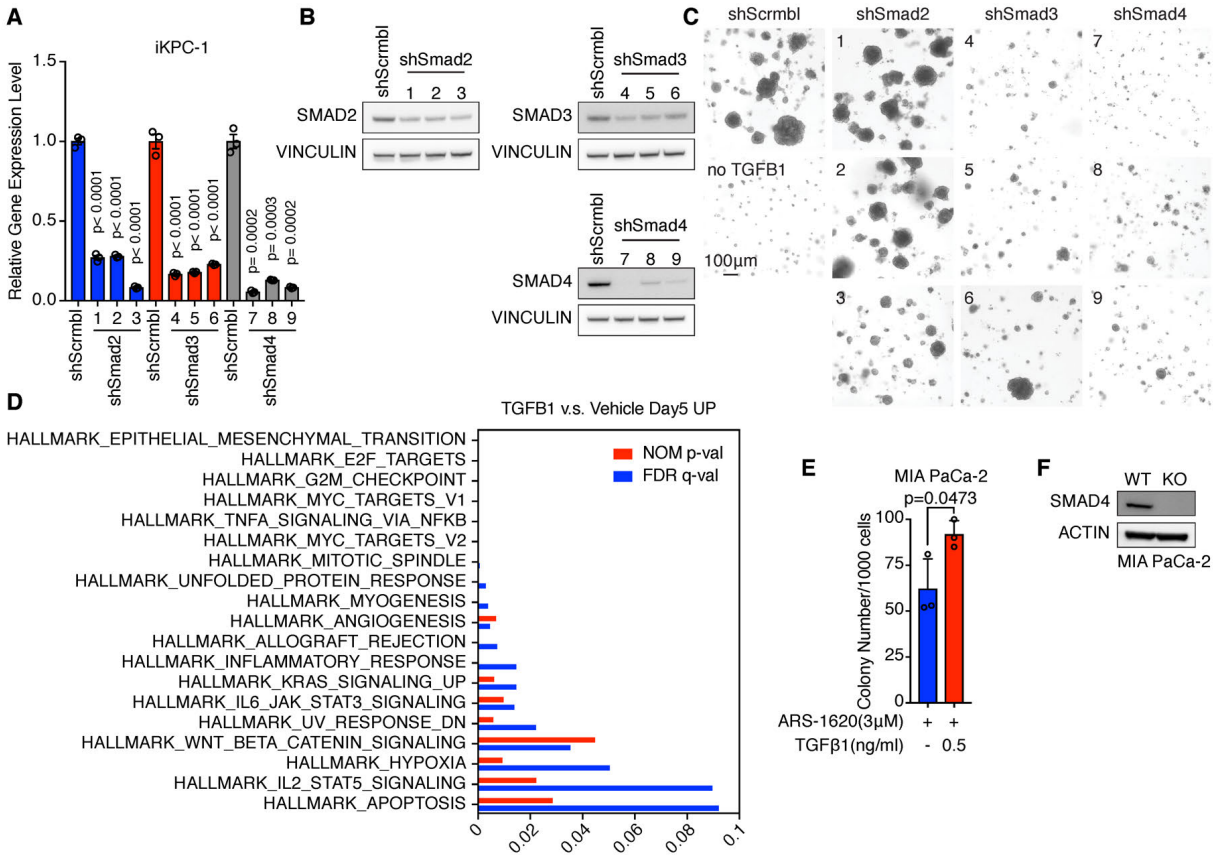

**Supplementary Figure 4. Necessity of the canonical TGFβ pathway to promote pancreatic cancer cells to bypass KRAS\* dependency.** **A** and **B**, Validation of knockdown efficiency of *Smad2*, *Smad3* and *Smad4* shRNAs in iKPC-1 cells by qRT-PCR (**A**) and western blot (**B**) analysis. **C**, Representative images of TGFβ1-driven KRAS\*-independent colony formation comparing scramble control and knockdown of *Smad2*, *Smad3* and *Smad4*. **D**, Gene signatures enriched in iKPC cells treated with TGFβ1 versus cells treated with vehicle control 5 days after KRAS\* extinction in 3-D culture by GSEA analysis of RNA-seq data (n = 3 for each group). **E**, TGFβ promotes MIA PaCa-2 cells to get resistant to KRAS<sup>G12C</sup> inhibitor ARS-1620 treatment *in vitro*. Data are represented as mean ± SD. **F**, Validation of SMAD4 knockout in human MIA PaCa-2 cells by western blot analysis. For **A** and **E**, data are represented as mean ± SD, and two-tailed unpaired t tests were performed to calculate the p values.



**Supplementary Figure 5**

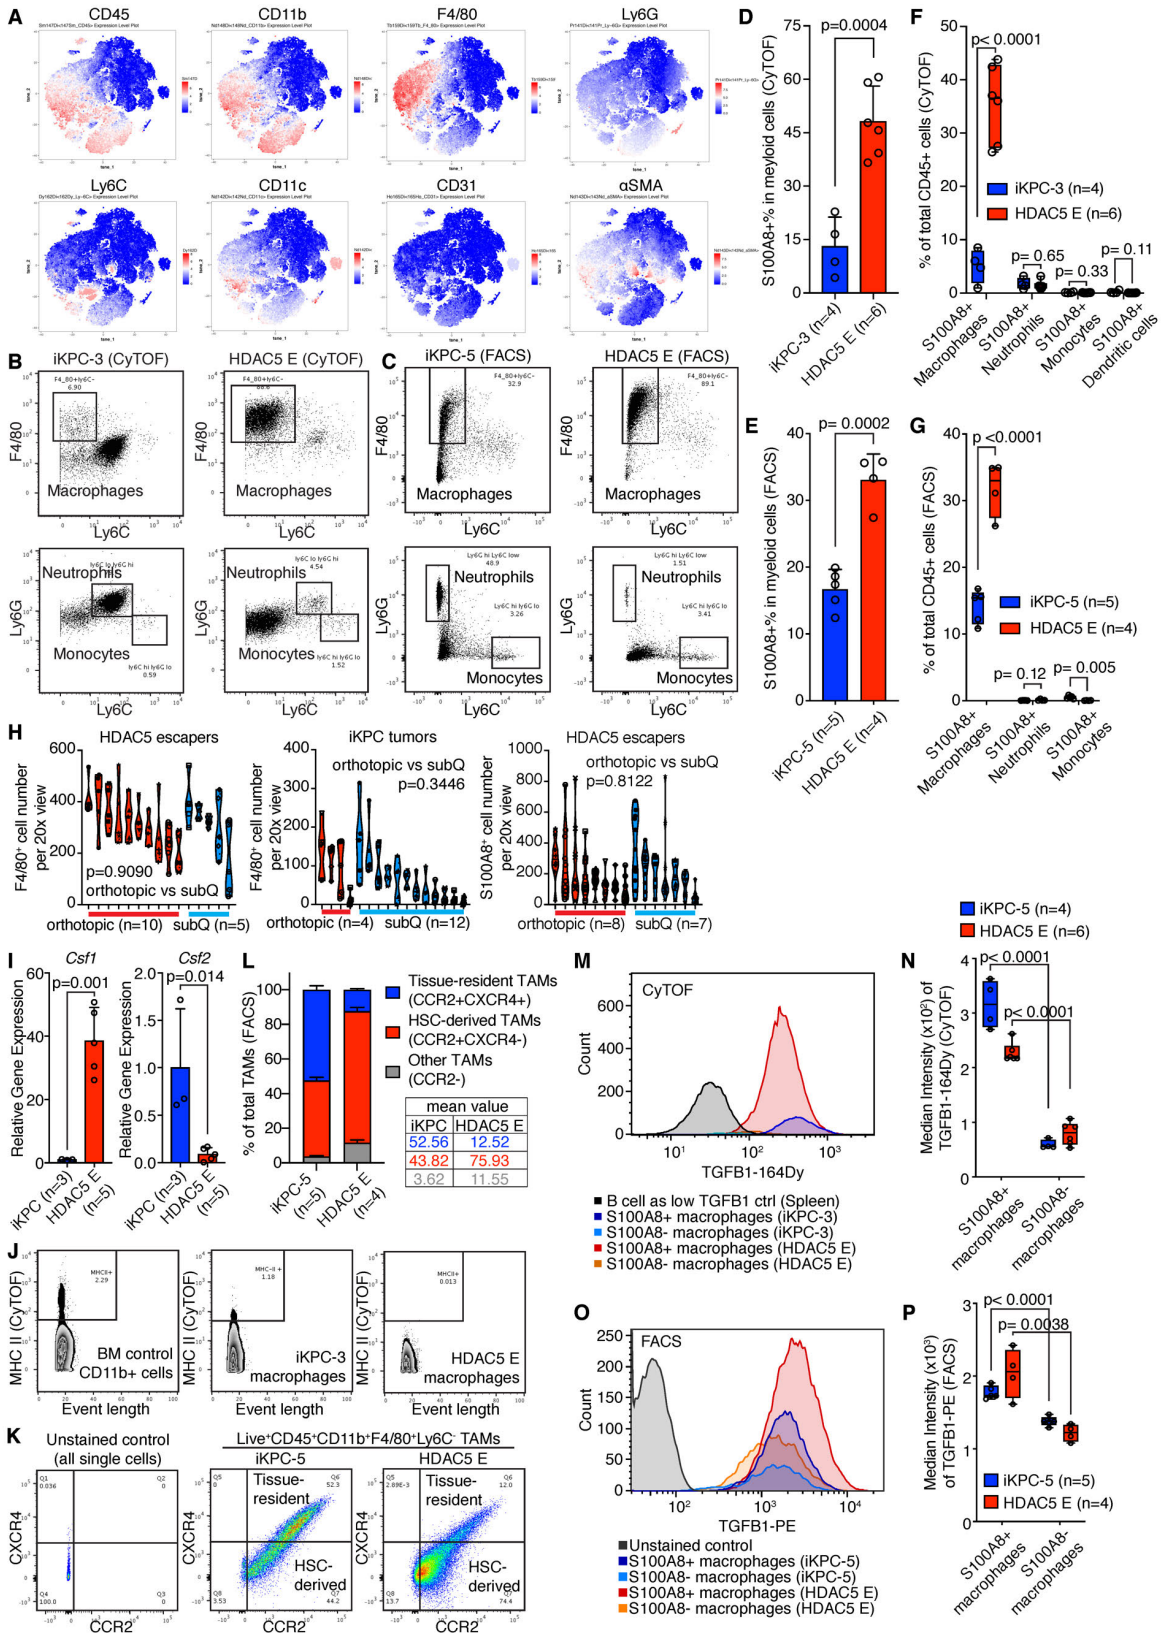

**Supplementary Figure 5. Characterization of tumor-infiltrated immune cells.** **A**, Expression distribution of lineage marker genes by tSNE plot analysis of CyTOF data related to Fig. 3A. **B** and **C**, Gates of macrophages, monocytes and neutrophils in a representative iKPC tumor and a *HDAC5*-driven escaper by CyTOF (**B**) and FACS (**C**) analysis. Data are displayed by FlowJo.  $CD45^+CD11b^+F4/80^+Ly6C^-$  cells represented macrophages;  $CD45^+CD11b^+F4/80^-Ly6G^{high}Ly6C^{low}$  cells represented neutrophils.  $CD45^+CD11b^+F4/80^-Ly6G^{low}Ly6C^{high}$  cells represented monocytes. **D-E**, Percentage of  $S100A8^+$  cells in myeloid cells comparing iKPC tumors and *HDAC5* escapers by CyTOF (**D**) and FACS (**E**) analysis. **F** and **G**, Percentage of different  $S100A8^+$  myeloid cell types in iKPC tumors and *HDAC5* escapers by CyTOF (**F**) and FACS (**G**) analysis. **H**, Comparison of  $F4/80^+$  cell numbers by IHC staining in different *HDAC5* escaper tumors (left) or iKPC primary tumors (middle) generated from subcutaneous and orthotopic allograft models; comparison of  $S100A8^+$  cell numbers after IHC staining in different *HDAC5* escapers (right) generated from subcutaneous and orthotopic allograft models. Two-tailed unpaired t tests between the orthotopic and subcutaneous (subQ) groups including all the samples were performed to calculate the p values. **I**, RNA expression of *Csf1* and *Csf2* in iKPC cells (n = 3) and *HDAC5* escaper cells (n = 5) by qRT-PCR analysis. **J**, Gates of the  $MHC\ II^+$  cells in bone marrow (BM) myeloid cells and in macrophages from an iKPC-3 tumor and a *HDAC5* escaper by FlowJo analysis of the FACS data. **K**, Gates of tissue-resident and HSC-derived macrophages in a representative iKPC-5 tumor and a *HDAC5* escaper by FACS analysis. Data are displayed by FlowJo.  $CXCR4^+CCR2^+$  macrophages represented tissue-resident TAMs;  $CXCR4^-CCR2^+$  macrophages cells represented HSC-derived TAMs. **L**, Quantification of the tissue-resident, HSC-derived and other tumor associated macrophages (TAMs) in iKPC-5 primary tumors and *HDAC5* escapers from orthotopic allograft mouse model in nude mice. **M**, Representative overlaid histograms of TGFB1-164Dy intensity distribution in  $S100A8^+$  and  $S100A8^-$  macrophages from *HDAC5* escapers and primary tumors, which were generated from subcutaneous allograft models in nude mice. B cells expressed low TGFB1 in our models, so we used the histogram of TGFB1-164Dy intensity distribution in B cells from spleen as the control for low TGFB1 expressing cells. **N**, The quantification of TGFB1-164Dy median intensities in  $S100A8^+$  and  $S100A8^-$  macrophages from *HDAC5* escapers and primary tumors, which were generated from subcutaneous allograft models in nude mice. **O**, Representative overlaid histograms of TGFB1-PE intensity distribution in  $S100A8^+$  and  $S100A8^-$  macrophages from *HDAC5* escapers and primary tumors, which were generated from orthotopic allograft models in nude mice. Unstained cells were used as negative

TGFB1 control. **P**, The quantification of TGFB1-PE median intensities in S100A8<sup>+</sup> and S100A8<sup>-</sup> macrophages from HDAC5 escapers and primary tumors, which were generated from orthotopic allograft models in nude mice. For **D**, **E** and **L**, data are represented as mean  $\pm$  SEM. For **I**, data are represented as mean  $\pm$  SD. For **D-G**, **I**, **N** and **P**, two-tailed unpaired t tests were performed to calculate the p values.

Supplementary Figure 6

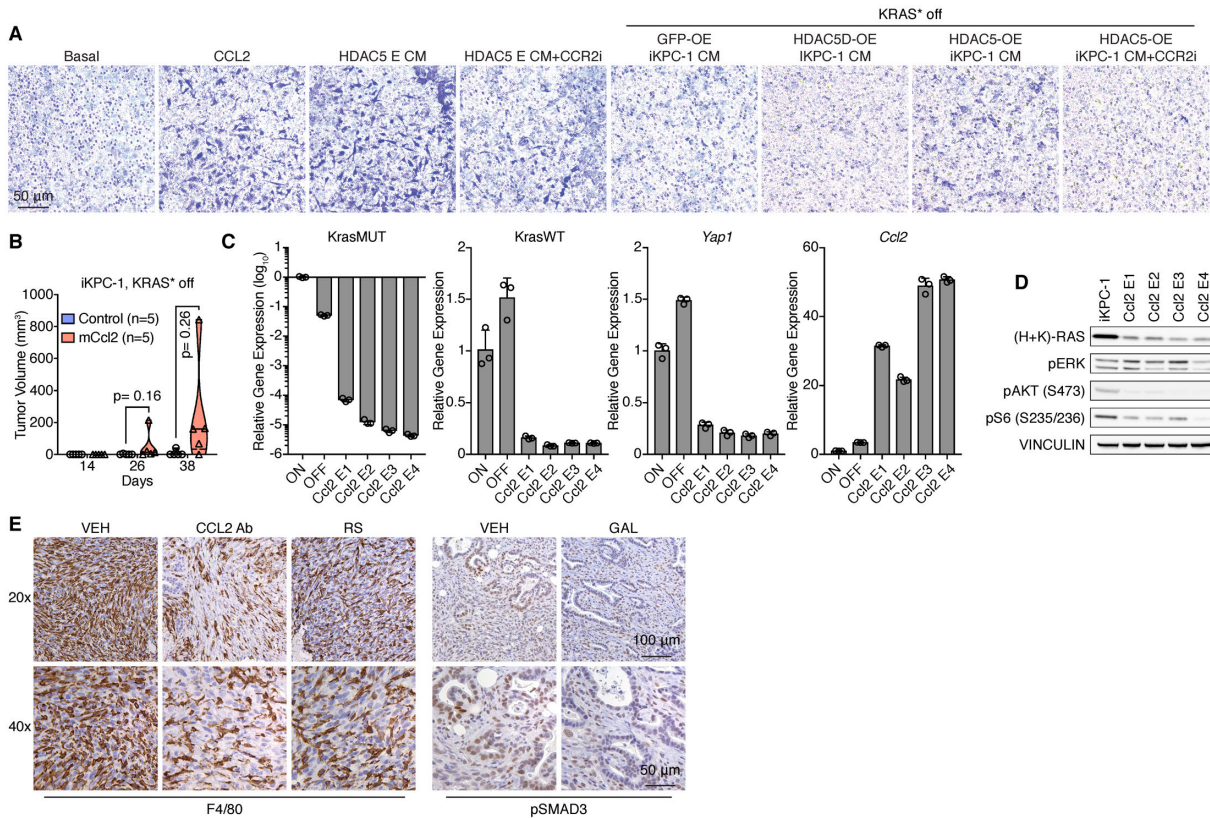

**Supplementary Figure 6. Overexpression of *HDAC5* in iKPC cells promotes macrophage infiltration via *CCL2/CCR2* axis.** **A**, Representative images of migrated macrophages in transwell assay quantified in Fig. 4C and 4D. **B**, Tumor growth analysis comparing iKPC-1 cells overexpressing GFP w/o Doxy feeding and *Ccl2* w/o Doxy feeding in subcutaneous allograft model in nude mice (n=5 for each group). Two-tailed unpaired t tests were performed to calculate the p values. **C**, Validation of gene expression of endogenous *Kras*, transgenic KRAS\*, *Yap1*, and *Ccl2* by qRT-PCR in *Ccl2* escapers. The KRAS\*-expressing iKPC-1 tumor and iKPC-1 tumor after KRAS\* extinction for 3 days were served as positive and negative controls, respectively. Data are represented as mean  $\pm$  SD. **D**, Validation of KRAS\* downstream signaling pathways in *Ccl2* escaper cells by western blot analysis. **E**, Related to Fig. 4I, CCR2 inhibitor RS 504393 (RS) and CCL2 neutralizing antibody (CCL2 Ab) attenuated macrophage infiltration into tumors by IHC analysis of F4/80 compared to vehicle control (VEH); TGFBR inhibitor Galunisertib (GAL) inhibited TGF $\beta$  pathway activation in tumor cells by IHC analysis of pSMAD3 compared to vehicle control (VEH).

Supplementary Figure 7

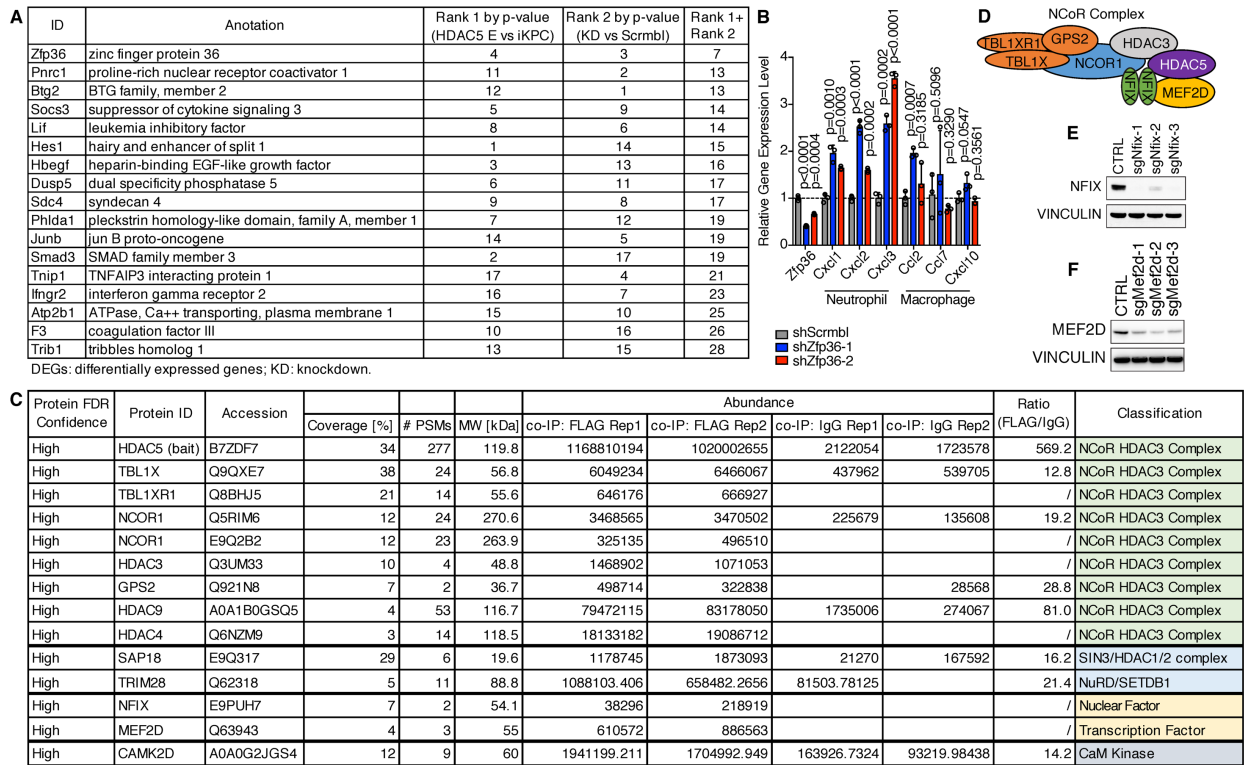

**Supplementary Figure 7. HDAC5 regulates expression of macrophage-recruiting chemokines through *Socs3*.** **A**, Exploration of *HDAC5* targets by overlapping 3 profiling datasets as described in Fig. 5A. Seventeen candidate genes were filtered out and ranked by p-values in the 2 RNA-seq datasets from low to high. **B**, Gene expression of neutrophil- and macrophage-attracted chemokines after knockdown of *Zfp36* in iKPC cells. Data are represented as mean  $\pm$  SD, and two-tailed unpaired t tests were performed to calculate the p values. **C**, Identification of potential *HDAC5* interactors by co-IP/MS analysis. **D**, Schematic model of the potential *HDAC5* corepressor complex. **E** and **F**, Validation of knockdown efficiency of *Nfix* (**E**) and *Mef2d* (**F**) using CRISPR/Cas9 in *HDAC5* escaper cells by western blot analysis.

Supplementary Figure 8

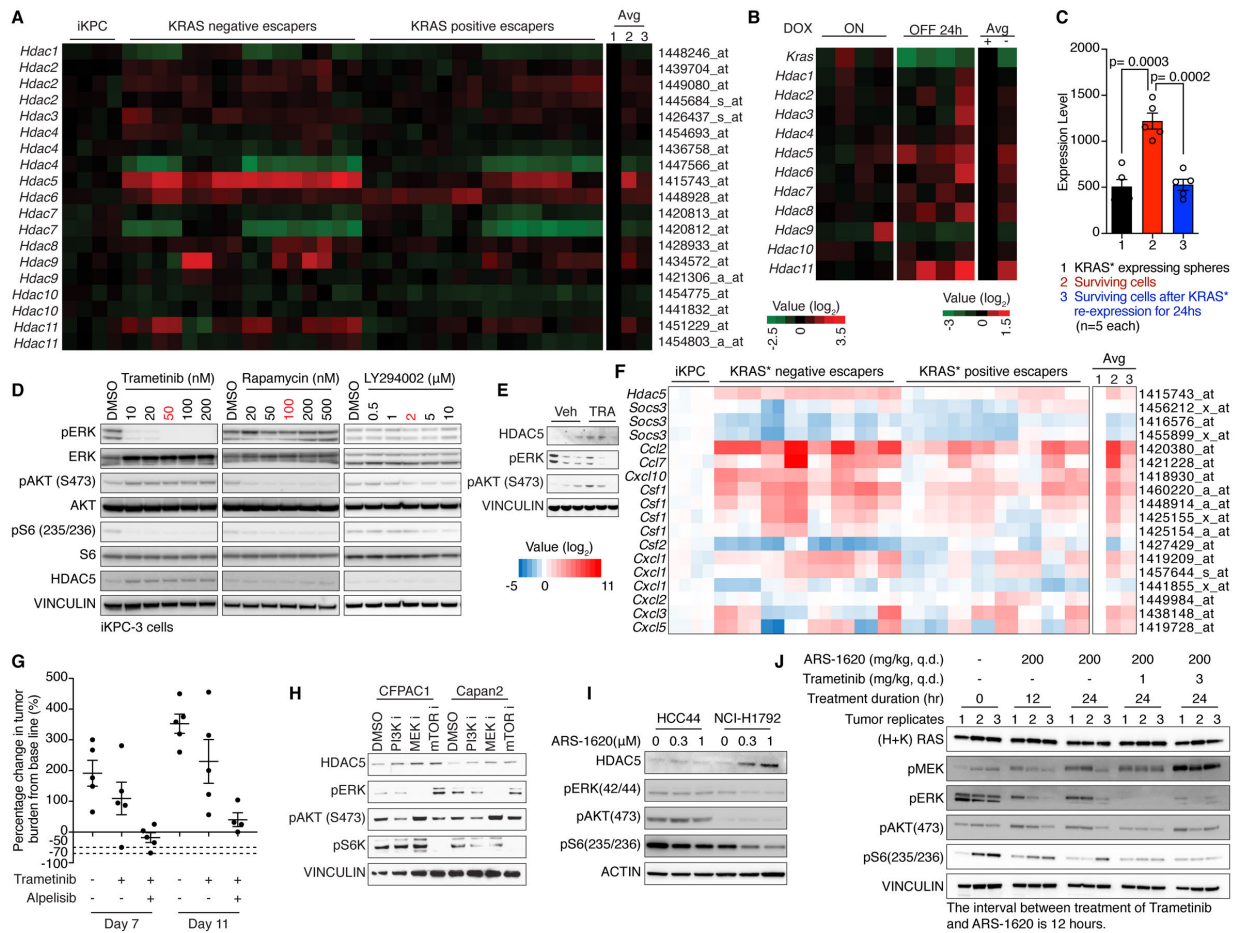

**Supplementary Figure 8. HDAC5 is upregulated after inhibition of the KRAS\*/MAPK pathway in *de novo* generated escapers and human PDAC lines.** **A**, Hdac expression in iKPC tumors, *de novo* generated KRAS\* negative escapers and KRAS\* reactivated escapers. “1”, “2” and “3” are representing “iKPC cells”, “KRAS\*-negative escapers” and “KRAS\*-positive escapers”, respectively. **B**, Hdac expression in KRAS\*-expressing iKPC tumor samples and samples 24 hours after KRAS\* extinction. **C**, Hdac5 is upregulated in surviving cells. Two-tailed unpaired t tests were performed to calculate the p values. **D**, Dosage titration and on-target effect determination of MEK inhibitor Trametinib, mTOR inhibitor Rapamycin, and PI3Ka inhibitor LY294002 in iKPC-3 cells by western blot analysis. The red- highlighted concentrations were chosen for molecular and functional analysis *in vitro*. **E**, HDAC5 is upregulated in transplanted iKPC tumors after Trametinib (TRA) treatment. **F**, RNA expression of chemokines and cytokines that chemoattract macrophages and neutrophils in iKPC cells, KRAS\*-negative escapers and KRAS\*-positive escapers. “1”, “2” and “3” represent “iKPC cells”, “KRAS\*-negative escapers”

and “KRAS\*-positive escapers”, representatively. **G**, Comparison of tumor growth between vehicle control, MEK inhibitor Trametinib only and dual inhibition of MEK by Trametinib and PI3K $\alpha$  by Alpelisib in transplanted syngeneic iKPC tumors ( $n = 7$ ). Tumor sizes were measured at Day 7 and Day 11 post-treatment. Data are represented as mean  $\pm$  SEM. **H**, Western blot analysis shows regulation of HDAC5 expression by KRAS\* downstream signaling pathways in human PDAC cell lines. **I**, Western blot analysis shows upregulation of HDAC5 expression by KRAS<sup>G12C</sup> inhibitor ARS-1620 in human NSCLC cell lines with KRAS<sup>G12C</sup> mutation. **J**, Related to Fig. 6J, pharmacodynamic determination of KRAS<sup>G12C</sup> inhibitor ARS-1620 alone and in combination with MEK inhibitor Trametinib in MIA PaCa-2 xenograft tumors in nude mice.

**Supplementary Figure 9**

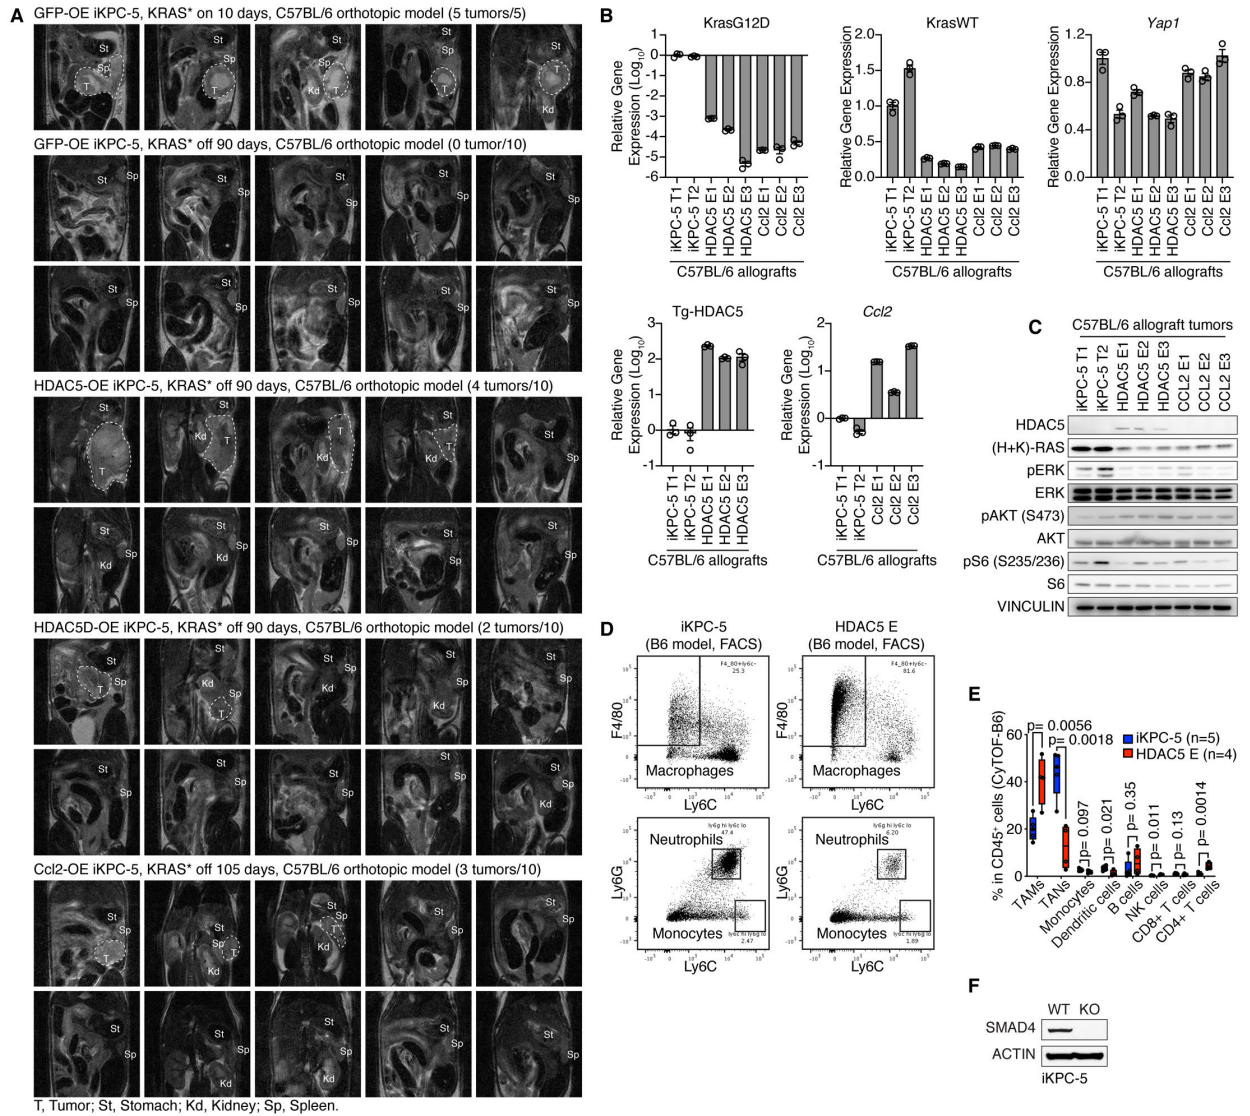

**Supplementary Figure 9. Characterization of *HDAC5* escapers generated in syngeneic mouse models.** **A**, MRI images to examine the tumor burden of orthotopically transplanted GFP-, *HDAC5*-, *HDAC5D* and *Ccl2*-OE iKPC-5 cells in C57BL/6 mice after KRAS\* extinction at indicated days. MRI images of KRAS\*-expressing GFP-OE iKPC-5 tumors were used as positive control. **B**, Transcriptional expression of KRAS\*, endogenous *Kras*, endogenous *Yap1*, transgenic *HDAC5* and total *Ccl2* in *HDAC5* and *Ccl2* escapers by qRT-PCR analysis. The iKPC tumors were used as control. **C**, Activation of KRAS\* signaling pathway in *HDAC5* and *Ccl2* escapers by western blot analysis. The iKPC tumors were used as control. **D**, Gates of macrophages, monocytes and neutrophils in a representative iKPC tumor and a *HDAC5* escaper tumor generated from orthotopic allograft models in C57BL/6 mice by FACS analysis. Data are displayed by FlowJo. **E**,



CyTOF analysis of immune cell subtypes in iKPC-5 primary tumors (n = 5) and *HDAC5* escaper tumors (n = 4) generated from orthotopic allograft models in C57BL/6 mice. Two-tailed unpaired t tests were performed to calculate the p values. **F**, Validation of SMAD4 knockout in iKPC-5 cells by western blot analysis. For **B** and **E**, data are represented as mean  $\pm$  SEM.
